# Supplementary material
Source: PubMed Central journal article supplement (PMC3910347)
Supplement: NIHMS507886-supplement-1.pdf [file NIHMS507886-supplement-1.pdf]

## Supplementary Information

### **High-Throughput Sequencing of the Paired Human Immunoglobulin Heavy and Light Chain Repertoire**

Brandon J. DeKosky<sup>1</sup>, Gregory C. Ippolito<sup>2</sup>, Ryan P. Deschner<sup>1</sup>, Jason J. Lavinder<sup>3</sup>, Yariv Wine<sup>1</sup>, Brandon M. Rawlings<sup>1</sup>, Navin Varadarajan<sup>4</sup>, Claudia Giesecke<sup>5</sup>, Thomas Dörner<sup>5</sup>, Sarah F. Andrews<sup>6</sup>, Patrick C. Wilson<sup>6</sup>, Scott P. Hunicke-Smith<sup>3</sup>, C. Grant Willson<sup>1,7</sup>, Andrew D. Ellington<sup>3,7</sup>, George Georgiou<sup>1,2,3,8</sup>

<sup>1</sup>*Department of Chemical Engineering, University of Texas at Austin, Austin, Texas, United States of America*

<sup>2</sup>*Section of Molecular Genetics and Microbiology, University of Texas at Austin, Austin, Texas, United States of America*

<sup>3</sup>*Institute for Cellular and Molecular Biology, University of Texas at Austin, Austin, Texas, United States of America*

<sup>4</sup>*Department of Chemical & Biomolecular Engineering, University of Houston, Houston, Texas, United States of America*

<sup>5</sup>*Department of Medicine, Rheumatology, and Clinical Immunology, Charité University Medicine, Berlin, and DRFZ Berlin, Germany*

<sup>6</sup>*Section of Rheumatology, Department of Medicine, University of Chicago, Chicago, Illinois, United States of America*

<sup>7</sup>*Department of Chemistry & Biochemistry, University of Texas at Austin, Austin, Texas, United States of America*

<sup>8</sup>*Department of Biomedical Engineering, University of Texas at Austin, Austin, Texas, United States of America*

Correspondence should be addressed to G.G. ([gg@che.utexas.edu](mailto:gg@che.utexas.edu)).

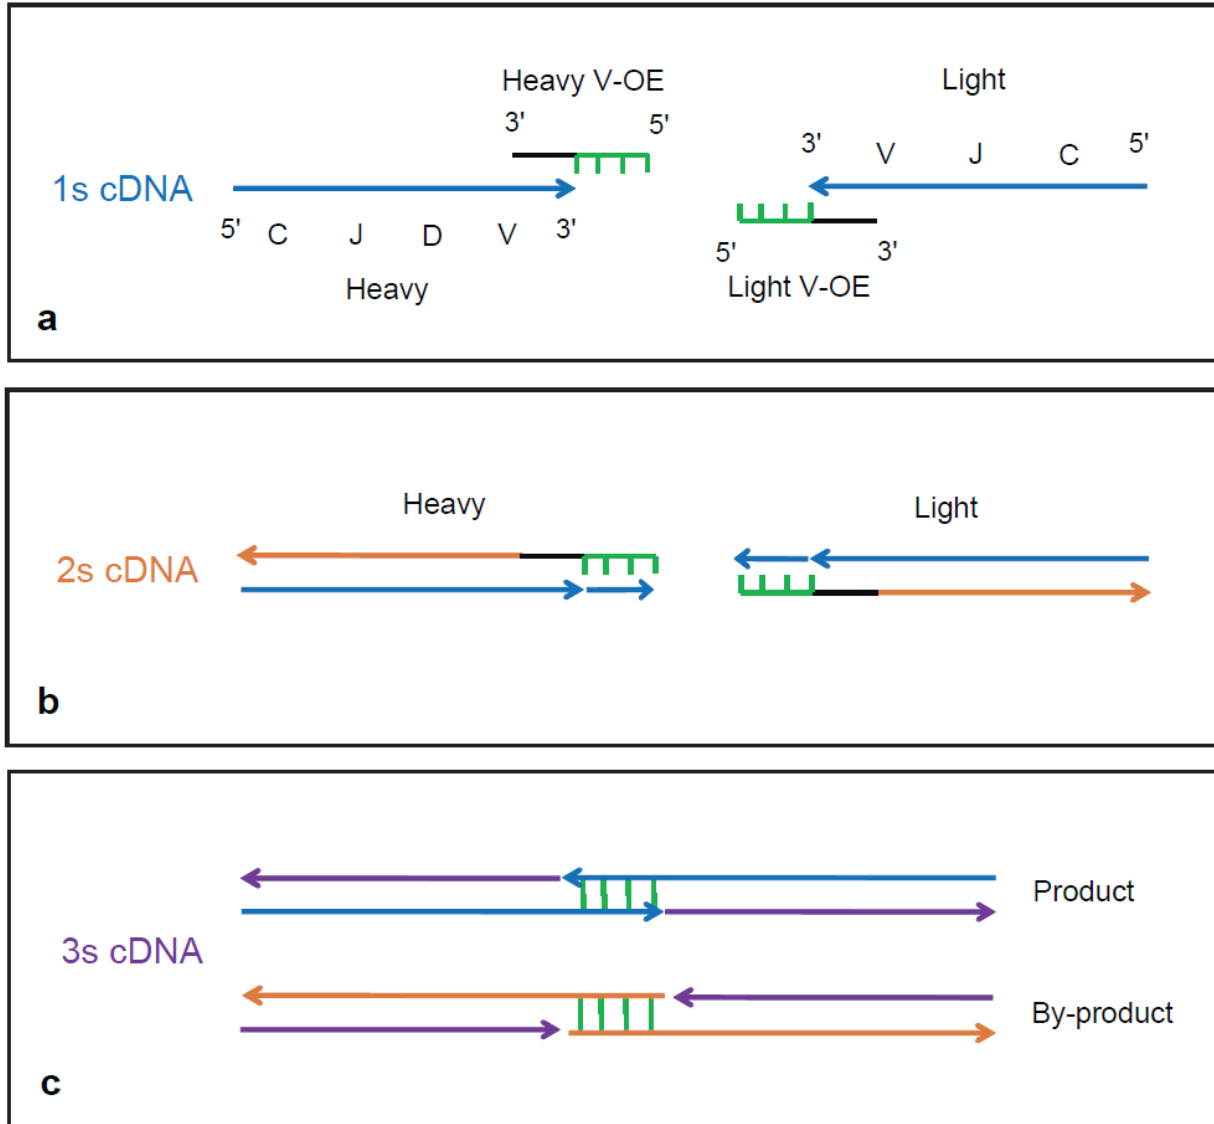

**Supplementary Figure 1** An overview of the linkage (overlap extension) RT-PCR process. a) V-region primers (black) with a 5' complementary heavy/light overlap region (green) anneal to first strand cDNA. b) Second strand cDNA is formed by 5' to 3' extension; the overlap region is incorporated into all cDNA. c) After denaturation, heavy and light chains with first strand sense anneal to generate a complete 850 bp product through 5' to 3' extension. The CDR-H3 and CDR-L3 are located near the outside of the final linked construct to allow CDR3 analysis by 2x250 paired-end Illumina sequencing. Linkage RT-PCR primer sequences are given in Supplementary Table 5 (V-region primers denoted "fwd-OE" and constant region primers denoted "rev-OE").

**Supplementary Table 1** Key statistics from several paired VH:VL repertoires. TD-tetanus toxoid/diphtheria toxoid, MSD-Merck Sharpe & Dohme

| <b>Immunization</b>                | n/a                            | Tetanus Toxoid (TD, MSD)                         | Influenza (2010-11 Fluvirin) |
|------------------------------------|--------------------------------|--------------------------------------------------|------------------------------|
| <b>Cell Type</b>                   | IgG <sup>+</sup> B lymphocytes | Day 7 post-TT boost TT <sup>+</sup> plasmablasts | Day 14 memory B cells        |
| <b>Fresh Cells vs. Freeze/Thaw</b> | Fresh                          | Freeze/Thaw                                      | Freeze/Thaw                  |
| <b>Cell:Well Ratio</b>             | 1:10                           | 1:425                                            | 1:39                         |
| <b>% cells as single cells</b>     | 95.1%                          | 99.9%                                            | 98.7%                        |
| <b>Unique CDR-H3 Recovered</b>     | 2,716                          | 86                                               | 240                          |
| <b>Control Cell Spike</b>          | IM-9                           | ARH-77                                           | IM-9                         |
| <b>Accuracy Ratio<sup>1</sup></b>  | 78:1                           | 650:1                                            | 942:1                        |

<sup>1</sup> For known spiked cells, (reads correct VL):(reads top incorrect VL)

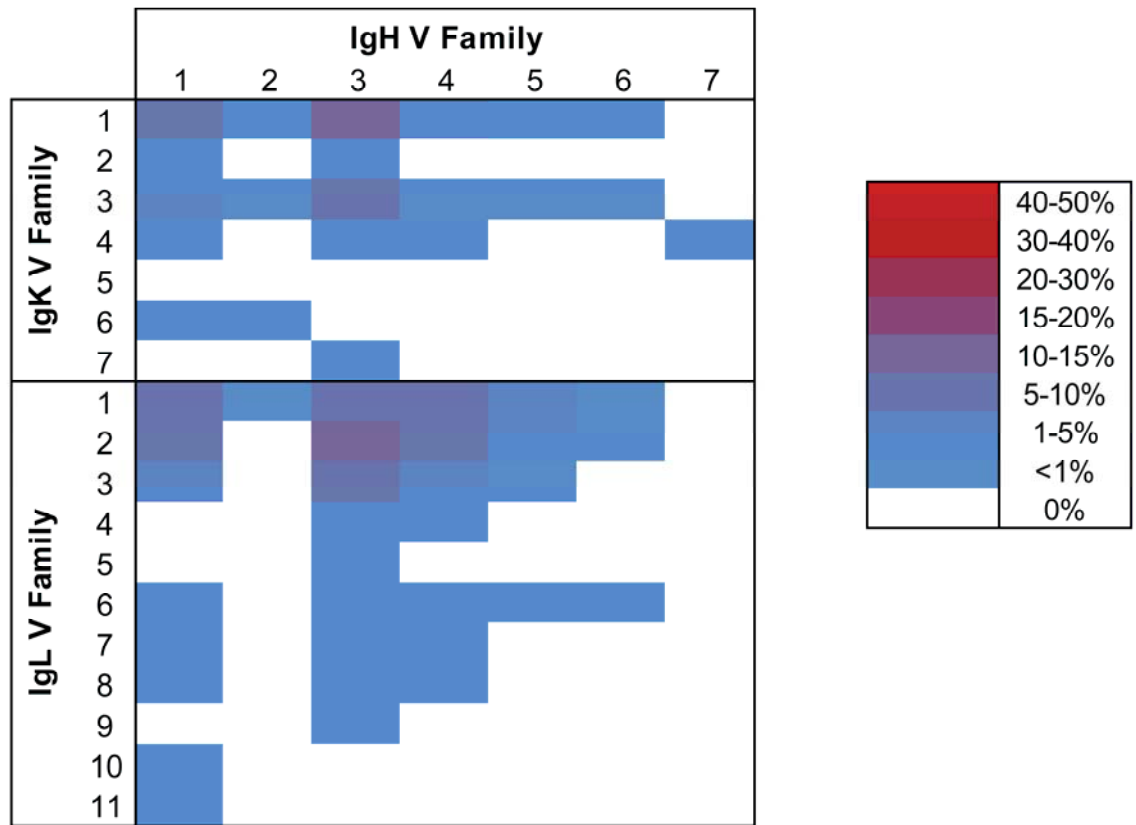

**Supplementary Figure 2** A heat map of VH:VL pairings from IgG<sup>+</sup> class-switched peripheral B cells isolated from a healthy volunteer (n=2,248). The experiment presented here is a replicate of Fig. 2a using donated blood from a different individual.

**Supplementary Table 2** Key statistics for the IgG<sup>+</sup> VH:VL pairing experiment from a second volunteer (Supplementary Fig. 2).

|                                    |                                |
|------------------------------------|--------------------------------|
| <b>Immunization</b>                | n/a                            |
| <b>Cell Type</b>                   | IgG <sup>+</sup> B lymphocytes |
| <b>Fresh Cells vs. Freeze/Thaw</b> | Fresh                          |
| <b>Cell:Well Ratio</b>             | 1:10                           |
| <b>% cells as single cells</b>     | 95.1%                          |
| <b>Unique CDR-H3 Recovered</b>     | 2,248                          |
| <b>Control Cell Spike</b>          | IM-9                           |
| <b>Accuracy Ratio<sup>1</sup></b>  | 125:1                          |

<sup>1</sup> For known spiked cells, (reads correct VL):(reads top incorrect VL)

**Supplementary Table 3** Analysis of overlapping heavy chain sequences and paired light chain sequences identified by both single cell RT-PCR and high-throughput VH:VL pairings in a memory B cell population isolated from an individual 14 days post-vaccination with the 2010-2011 trivalent FluVirin influenza vaccine.

| Seq ID | Isotype | CDR-H3                                                          | Paired CDR-L3 <sup>1</sup>          | Source          |
|--------|---------|-----------------------------------------------------------------|-------------------------------------|-----------------|
| 2D02   | IgM     | gcgagaggcggaaatgggcgacccttgacaac                                | gcagcatgggatgacagcctgaatggttgggtg   | Sanger scRT-PCR |
| 2D02   | IgM     | gcgagaggcggaaatgggcgacccttgacaac                                | gcagcatgggatgacagcctgaatggttgggtg   | MiSeq VH:VL     |
| 3D05   | IgM     | gcgagaaggtactttgactac                                           | gnagcatgggatgacagcctgaatggttggntg   | Sanger scRT-PCR |
| 3D05   | IgM     | gcgagaaggtactttgactac                                           | gcagcatgggatgacagcctgaatggttggctg   | MiSeq VH:VL     |
| 1E02   | IgG1    | gcgcgacatggccctgcgggaaaaagcgctatggtttgatatc                     | cagtccatgacagcggactgaatggttatgtggtc | Sanger scRT-PCR |
| 1E02   | IgG     | gcgcgacatggccctgcgggaaaaagcgctatggtttgatatc                     | cagtccatgacaacagactgaatggttatgtggtg | MiSeq VH:VL     |
| 3A01   | IgG3    | gcgagagtaatagcagctcgcgaccgccggatcactcctaactactaccgccctatggacgtc | caggtgtgggatagtagtagtgaccatcaggtg   | Sanger scRT-PCR |
| 3A01   | IgG     | gcgagagtaatagcagctcgcgaccgccggatcactcctaattactaccgccctatggacgtc | caggtgtgggacagtagtagtgatcatcaggtg   | MiSeq VH:VL     |

<sup>1</sup> The 2D02 and 3D05 CDR-L3 sequences are highly similar but differ by two bases



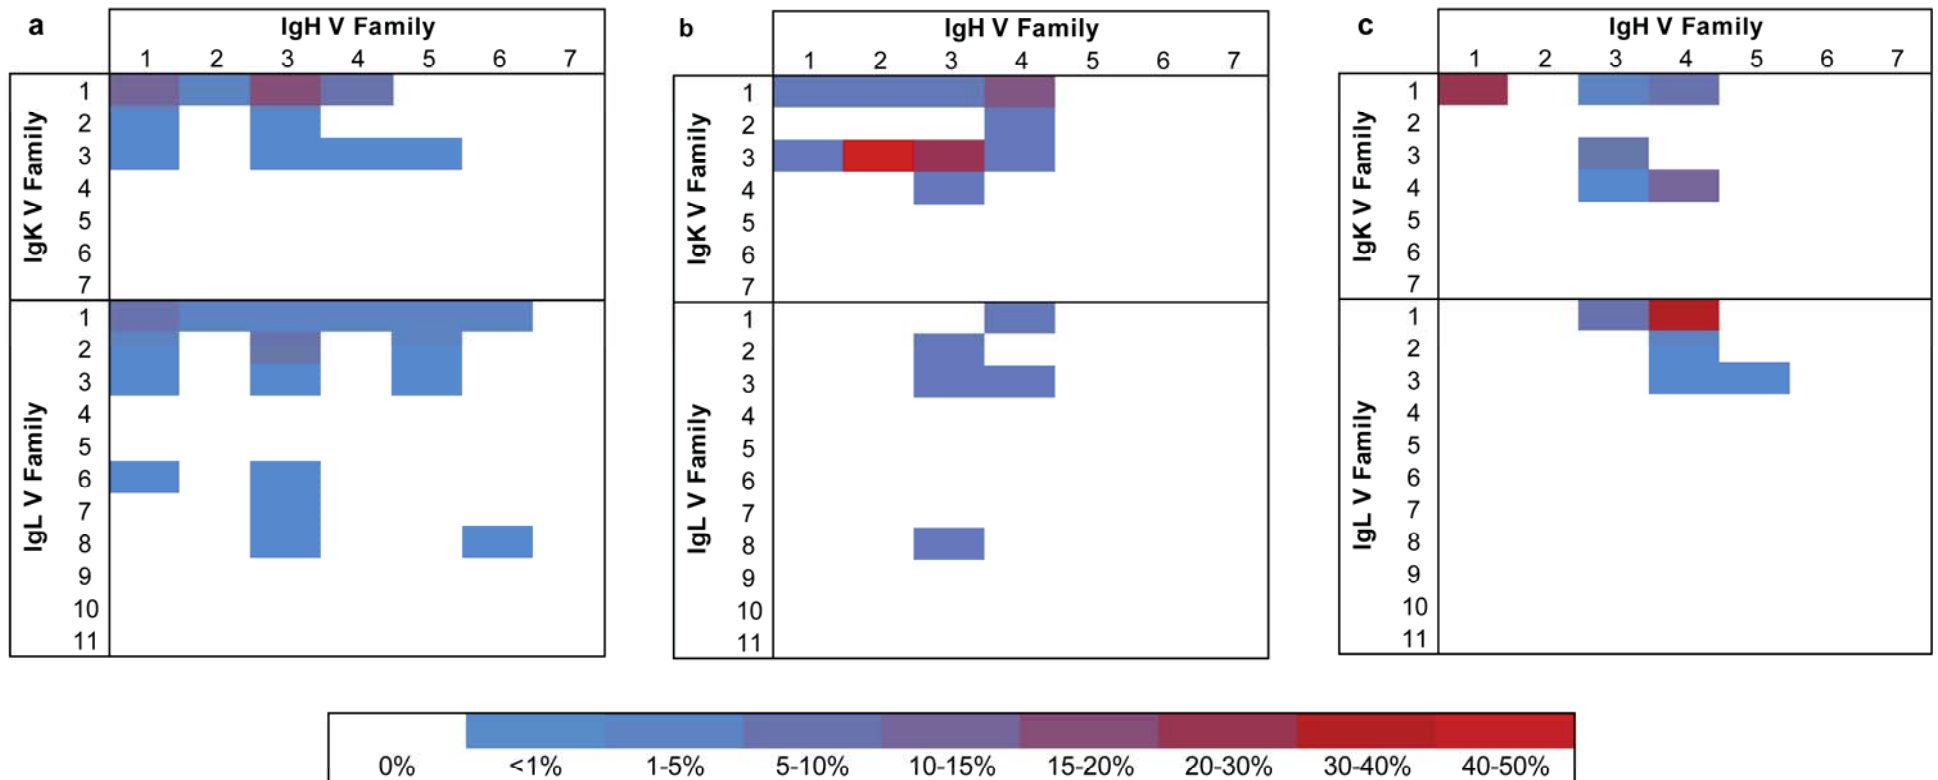

**Supplementary Figure 3** As Fig. 2b comprised the lowest sample size in Figure 2 (n=86 unique pairs, compared to Fig. 2a, n=2,716, and Fig. 2c, n=240) a simulation was performed to randomly select 86 VH:VL pairs from Fig. 2a and 2c and normalize all panels to 86 unique sequences. (a) healthy donor peripheral IgG<sup>+</sup> B cells, (b) day 7 tetanus-toxoid specific plasmablasts, and (c) day 14 post-influenza vaccination memory B cells. The simulation presented here facilitates comparison between panels a, b, and c.



**Supplementary Table 4** Statistical analysis of pairing accuracy

| <b>Experiment</b>                                             | <i>Resting IgG+ repertoire</i> | <i>Tetanus toxoid D7 plasmablasts</i> |
|---------------------------------------------------------------|--------------------------------|---------------------------------------|
| <b>Figure</b>                                                 | 2a                             | 2b                                    |
| <b>Cell:Well Ratio</b>                                        | 1:10                           | 1:425                                 |
| <b>Fraction Single Cells<sup>1</sup></b>                      | 0.951                          | 0.999                                 |
| <b>Spiked Clone</b>                                           | IM-9                           | ARH-77                                |
| <b>Spike %</b>                                                | 4.0                            | 7.5                                   |
| <b>Estimated # spiked cells</b>                               | 2,830                          | 30                                    |
| <b>Estimated Spiked Cells as Single Cells<sup>1</sup></b>     | 2,691                          | 30                                    |
| <b>Estimated Spiked Cells as 2-cells-per-well<sup>1</sup></b> | 139                            | 0                                     |
| <b>Paired Reads in Dataset</b>                                | 287,572                        | 30,238                                |
| <b>Correctly Paired Spike VH:VL Reads</b>                     | 14,805                         | 871                                   |
| <b>Predicted Mismatching Rate<sup>1</sup></b>                 | 4.9%                           | 0.1%                                  |
| <b>Spike VH : Top Non-Spike VL Mismatching Rate</b>           | 1.3%                           | 0.15%                                 |
| <b>Top Non-Spike VH : Spike VL Mismatching Rate</b>           | 7.8%                           | 0.31%                                 |
| <b>Total Recovered VH:VL Pairs From Sample</b>                | 2,716                          | 86                                    |

<sup>1</sup> Calculated from the Poisson distribution (Supplementary Information, pg. 3)

**Supplementary Table 5** Overlap Extension (OE) RT-PCR primer mix

| <b>Conc. (nM)</b> | <b>Primer ID</b>   | <b>Sequence</b>                                    |
|-------------------|--------------------|----------------------------------------------------|
| 400               | CHrev-AHX89        | <i>CGCAGTAGCGGTAAACGGC</i>                         |
| 400               | CLrev-BRH06        | <i>GCGGATAACAATTTACACAGG</i>                       |
| 40                | hlgG-rev-OE-AHX89  | <i>CGCAGTAGCGGTAAACGGC AGGGYGCCAGGGGGAAGAC</i>     |
| 40                | hlgA-rev-OE-AHX89  | <i>CGCAGTAGCGGTAAACGGC CGGGAAGACCTTGGGGCTGG</i>    |
| 40                | hlgM-rev-OE-AHX89  | <i>CGCAGTAGCGGTAAACGGC CACAGGAGACGAGGGGAAA</i>     |
| 40                | hlgKC-rev-OE-BRH06 | <i>GCGGATAACAATTTACACAGG GATGAAGACAGATGGTGCAG</i>  |
| 40                | hlgLC-rev-OE-BRH06 | <i>GCGGATAACAATTTACACAGG TCCTCAGAGGAGGGYGGAA</i>   |
| 40                | hVH1-fwd-OE        | <i>TATTTCCCATGGCGCGCCCAGGTCCAGCTKGTRCAGTCTGG</i>   |
| 40                | hVH157-fwd-OE      | <i>TATTTCCCATGGCGCGCCCAGGTGCAGCTGGTGSARTCTGG</i>   |
| 40                | hVH2-fwd-OE        | <i>TATTTCCCATGGCGCGCCCAGRTCACCTTGAAGGAGTCTG</i>    |
| 40                | hVH3-fwd-OE        | <i>TATTTCCCATGGCGCGCCGAGGTGCAGCTGKTGGAGWCY</i>     |
| 40                | hVH4-fwd-OE        | <i>TATTTCCCATGGCGCGCCCAGGTGCAGCTGCAGGAGTCSG</i>    |
| 40                | hVH4-DP63-fwd-OE   | <i>TATTTCCCATGGCGCGCCCAGGTGCAGCTACAGCAGTGGG</i>    |
| 40                | hVH6-fwd-OE        | <i>TATTTCCCATGGCGCGCCCAGGTACAGCTGCAGCAGTCA</i>     |
| 40                | hVH3N-fwd-OE       | <i>TATTTCCCATGGCGCGCCTCAACACAACGGTTCCCAGTTA</i>    |
| 40                | hVK1-fwd-OE        | <i>GGCGCGCCATGGGAATAGCCGACATCCRGDTGACCCAGTCTCC</i> |
| 40                | hVK2-fwd-OE        | <i>GGCGCGCCATGGGAATAGCCGATATTGTGMTGACBCAGWCTCC</i> |
| 40                | hVK3-fwd-OE        | <i>GGCGCGCCATGGGAATAGCCGAAATTGTRWTGACRCAGTCTCC</i> |
| 40                | hVK5-fwd-OE        | <i>GGCGCGCCATGGGAATAGCCGAAACGACTCACGCAGTCTC</i>    |
| 40                | hVL1-fwd-OE        | <i>GGCGCGCCATGGGAATAGCCCAGTCTGTSBTGACGCAGCCGCC</i> |
| 40                | hVL1459-fwd-OE     | <i>GGCGCGCCATGGGAATAGCCCAGCCTGTGCTGACTCARYC</i>    |
| 40                | hVL15910-fwd-OE    | <i>GGCGCGCCATGGGAATAGCCCAGCCWKGCTGACTCAGCCMCC</i>  |
| 40                | hVL2-fwd-OE        | <i>GGCGCGCCATGGGAATAGCCCAGTCTGYCTGAYTCAGCCT</i>    |
| 40                | hVL3-fwd-OE        | <i>GGCGCGCCATGGGAATAGCCTCCTATGWGCTGACWCAGCCAA</i>  |
| 40                | hVL-DPL16-fwd-OE   | <i>GGCGCGCCATGGGAATAGCCTCCTCTGAGCTGASTCAGGASCC</i> |
| 40                | hVL3-38-fwd-OE     | <i>GGCGCGCCATGGGAATAGCCTCCTATGAGCTGAYRCAGCYACC</i> |
| 40                | hVL6-fwd-OE        | <i>GGCGCGCCATGGGAATAGCCAATTTTATGCTGACTCAGCCCC</i>  |
| 40                | hVL78-fwd-OE       | <i>GGCGCGCCATGGGAATAGCCCAGDCTGTGGTGACYCAGGAGCC</i> |

**Supplementary Table 6** Nested PCR primers.

| <b>Conc. (nM)</b> | <b>Primer ID</b>      | <b>Sequence</b>                 |
|-------------------|-----------------------|---------------------------------|
| 400               | hIgG-all-rev-OEnested | ATGGGCCCTGSGATGGGCCCTTGGTGGARGC |
| 400               | hIgA-all-rev-OEnested | ATGGGCCCTGCTTGGGGCTGGTCGGGGATG  |
| 400               | hIgM-rev-OEnested     | ATGGGCCCTGGGTTGGGGCGGATGCACTCC  |
| 400               | hIgKC-rev-OEnested    | GTGCGGCCGCGAGATGGTGCAGCCACAGTTC |
| 400               | hIgLC-rev-OEnested    | GTGCGGCCGCGAGGGYGGGAACAGAGTGAC  |

**Supplementary Table 7** VH and VL Separate Amplification Primers

| <b>Conc. (nM)</b> | <b>Primer ID</b>      | <b>Sequence</b>                 |
|-------------------|-----------------------|---------------------------------|
| 400               | hIgG-all-rev-OEnested | ATGGGCCCTGSGATGGGCCCTTGGTGGARGC |
| 400               | hIgA-all-rev-OEnested | ATGGGCCCTGCTTGGGGCTGGTCGGGGATG  |
| 400               | Linker-VHfwd-BC2      | NNNNTGAAGGGGCTAGCTATTCCCATCGCGG |
| 400               | hIgKC-rev-OEnested    | GTGCGCCCGCAGATGGTGCAGCCACAGTTC  |
| 400               | hIgLC-rev-OEnested    | GTGCGCCCGCAGGGYGGGAACAGAGTGAC   |
| 400               | Linker-VLfwd-BC2      | NNNNTGAAGGGCGCCGCGATGGGAAT      |
